# Supplementary material for: Atomic structure of the predominant GII.4 human norovirus capsid reveals novel stability and plasticity
Source: PubMed Central journal article supplement (PMC8913647; doi:10.1038/s41467-022-28757-z), 2022-03-10
Supplement: 41467_2022_28757_MOESM3_ESM.pdf [file 41467_2022_28757_MOESM3_ESM.pdf]

### **Description of Additional Supplementary Files**

File Name: Supplementary Movie 1

Description: Shows gray density corresponding to GII.4 VLP treated with EDTA and shows the structural variability along component 0 of 3DVA.

File Name: Supplementary Movie 2

Description: Shows the same 3DVA movie overlaid with the density of untreated GII.4 VLP colored in red.
